# Supplementary material for: Chordin-like 1, a Novel Adipokine, Markedly Promotes Adipogenesis and Lipid Accumulation
Source: MDPI journal article supplement (doi:10.3390/cells12040624), 2023-02-15
Supplement: s1 [file s1]

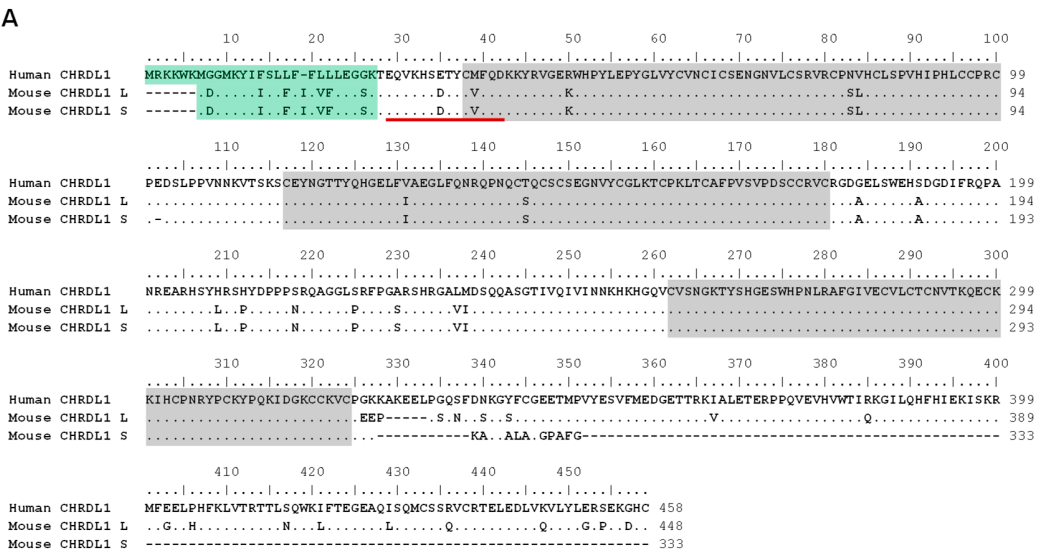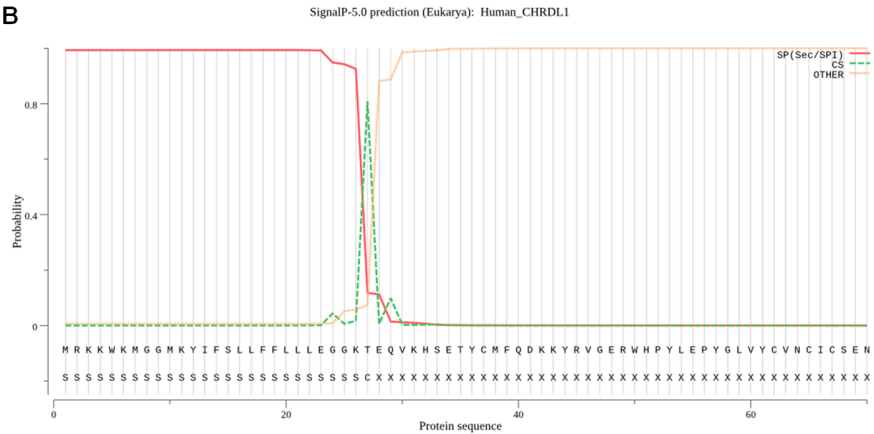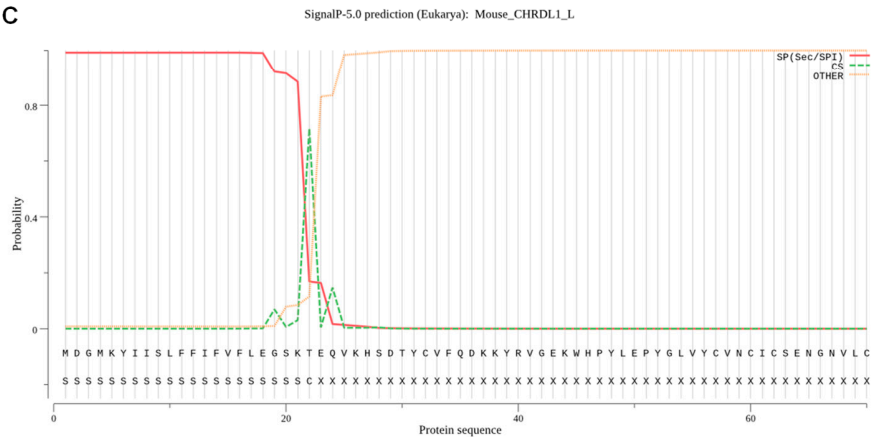



|       |          |                                                                                                       |                                                        |                                            |      |      |      |      |      |      |      |  |
|-------|----------|-------------------------------------------------------------------------------------------------------|--------------------------------------------------------|--------------------------------------------|------|------|------|------|------|------|------|--|
|       |          | 10                                                                                                    | 20                                                     | 30                                         | 40   | 50   | 60   | 70   | 80   | 90   | 100  |  |
| Human | CHRD1L   | ATGAGAAAAAGTGGAAATGGGAGGCATGAAATACATCTTTTCGTGTTGTTC                                                   | ---                                                    | TTTCTTTTGTCTAGAGGAGGCAAAACAGAGCAAGTAAACATT | 97   |      |      |      |      |      |      |  |
| Mouse | Chrd11 L | .....AT.....A.....C..A..T..ATC..G...C.....A.....A.....C                                               | .....A.....C.....C.....A.....C.....C.....A.....C.....C | 82                                         |      |      |      |      |      |      |      |  |
| Mouse | Chrd11 S | .....AT.....A.....C..A..T..ATC..G...C.....A.....A.....C                                               | .....A.....C.....C.....A.....C.....C.....A.....C.....C | 82                                         |      |      |      |      |      |      |      |  |
|       |          | 110                                                                                                   | 120                                                    | 130                                        | 140  | 150  | 160  | 170  | 180  | 190  | 200  |  |
| Human | CHRD1L   | CAGAGACATATTGCATGTTTCAAGACAAGAAGTACAGAGTGGGTGAGAGATGGCATCCTTACTCGAACTTATGGGTGGTTTACTGCGTGAACATGCAT    | 197                                                    |                                            |      |      |      |      |      |      |      |  |
| Mouse | Chrd11 L | .....C.....G.....T.....A.....C.....C.....G.....AC.....T.....T.....                                    | 182                                                    |                                            |      |      |      |      |      |      |      |  |
| Mouse | Chrd11 S | .....C.....G.....T.....A.....C.....C.....G.....AC.....T.....T.....                                    | 182                                                    |                                            |      |      |      |      |      |      |      |  |
|       |          | 210                                                                                                   | 220                                                    | 230                                        | 240  | 250  | 260  | 270  | 280  | 290  | 300  |  |
| Human | CHRD1L   | CTGCTCAGAGAAATGGAAATGTGCTTTGCAGCCGAGTCAGATGTCCAAATGTTCAATTGCCCTTCTCCTGTGCATATTCTCATCTGTGCTGCCCTCGCTGC | 297                                                    |                                            |      |      |      |      |      |      |      |  |
| Mouse | Chrd11 L | .....T.....C.....G.....T.....G..C..C.....A..C.....C.....T.....C.....                                  | 282                                                    |                                            |      |      |      |      |      |      |      |  |
| Mouse | Chrd11 S | .....T.....C.....G.....T.....G..C..C.....A..C.....C.....T.....C.....                                  | 282                                                    |                                            |      |      |      |      |      |      |      |  |
|       |          | 310                                                                                                   | 320                                                    | 330                                        | 340  | 350  | 360  | 370  | 380  | 390  | 400  |  |
| Human | CHRD1L   | CCAGAGACTCCTTACCCCCAGTGAACAAATGAAGGTGACCAGCAAGTCTTGCGAGTACAATGGGCAAACTTACCAACATGGAGAGCTGTTCTGAGCTGAAG | 397                                                    |                                            |      |      |      |      |      |      |      |  |
| Mouse | Chrd11 L | .....A.....A.....A.....A.....A.....A.....C.....A.....A.....A.....                                     | 379                                                    |                                            |      |      |      |      |      |      |      |  |
| Mouse | Chrd11 S | .....A.....A.....A.....A.....A.....A.....C.....A.....A.....A.....                                     | 379                                                    |                                            |      |      |      |      |      |      |      |  |
|       |          | 410                                                                                                   | 420                                                    | 430                                        | 440  | 450  | 460  | 470  | 480  | 490  | 500  |  |
| Human | CHRD1L   | GGCTCTTTTCAGAAATCGGCAACCAATCAATGCACCCAGTGCAGCTGTTTGGAGGGAAACGTGTATTGGTCTCAAGACTTGCCCCAAATTAACCTGTGC   | 497                                                    |                                            |      |      |      |      |      |      |      |  |
| Mouse | Chrd11 L | .....C.....G.....GT.....T.....C.....G.....T.....A..C.....C.....G.....                                 | 479                                                    |                                            |      |      |      |      |      |      |      |  |
| Mouse | Chrd11 S | .....C.....G.....GT.....T.....C.....G.....T.....A..C.....C.....G.....                                 | 479                                                    |                                            |      |      |      |      |      |      |      |  |
|       |          | 510                                                                                                   | 520                                                    | 530                                        | 540  | 550  | 560  | 570  | 580  | 590  | 600  |  |
| Human | CHRD1L   | CTTCCAGTCTCTGTTTCCAGATTCTGCTGCGGGTATGCAGAGGAGATGGAGAACTGTCAATGGGAACATTCTGATGGTGATATCTTCCGGCAACCTGCC   | 597                                                    |                                            |      |      |      |      |      |      |      |  |
| Mouse | Chrd11 L | A.....T.....A.....G.....C.....T.....A..G.....G.....G.....                                             | 579                                                    |                                            |      |      |      |      |      |      |      |  |
| Mouse | Chrd11 S | A.....T.....A.....G.....C.....T.....A..G.....G.....G.....                                             | 579                                                    |                                            |      |      |      |      |      |      |      |  |
|       |          | 610                                                                                                   | 620                                                    | 630                                        | 640  | 650  | 660  | 670  | 680  | 690  | 700  |  |
| Human | CHRD1L   | AACAGAGAAGCAAGACATCTTACCACCGCTCTCACTATGATCTCCACCAAGCCGACAGGCTGGAGGTCTGTCCCGCTTCTCTGGGGCCAGAAATCACC    | 697                                                    |                                            |      |      |      |      |      |      |      |  |
| Mouse | Chrd11 L | .....T...T..C.C.C...C.....A.A...A.....TC.....AG.....                                                  | 679                                                    |                                            |      |      |      |      |      |      |      |  |
| Mouse | Chrd11 S | .....T...T..C.C.C...C.....A.A...A.....TC.....AG.....                                                  | 679                                                    |                                            |      |      |      |      |      |      |      |  |
|       |          | 710                                                                                                   | 720                                                    | 730                                        | 740  | 750  | 760  | 770  | 780  | 790  | 800  |  |
| Human | CHRD1L   | GGGAGCTCTTATGGATTCCAGCAAGCATCAGGAACCATTTGTCAAATTTGTCATCAATAACAACACAGCATGGACAAGTGTGTGTTTCCAATGGAAA     | 797                                                    |                                            |      |      |      |      |      |      |      |  |
| Mouse | Chrd11 L | .....G.....A.....C.....G.....C.....G.....G.....A.....                                                 | 779                                                    |                                            |      |      |      |      |      |      |      |  |
| Mouse | Chrd11 S | .....G.....A.....C.....G.....C.....G.....G.....A.....                                                 | 779                                                    |                                            |      |      |      |      |      |      |      |  |
|       |          | 810                                                                                                   | 820                                                    | 830                                        | 840  | 850  | 860  | 870  | 880  | 890  | 900  |  |
| Human | CHRD1L   | GACCTATTCTCATGGCCAGTCTCGGACCCAAACCTCCGGGCATTTGGCATTGTGGAAGTGTGTGCTATGTAATGTGTAATGTACCAAGCAAGAGTGTAAAG | 897                                                    |                                            |      |      |      |      |      |      |      |  |
| Mouse | Chrd11 L | .....C.....A.....T.....A.....A.....A.....A.....C.....A.....A.....                                     | 879                                                    |                                            |      |      |      |      |      |      |      |  |
| Mouse | Chrd11 S | .....C.....A.....T.....A.....A.....A.....A.....C.....A.....A.....                                     | 879                                                    |                                            |      |      |      |      |      |      |      |  |
|       |          | 910                                                                                                   | 920                                                    | 930                                        | 940  | 950  | 960  | 970  | 980  | 990  | 1000 |  |
| Human | CHRD1L   | AAAAATCCACTGCCCAATCGATACCCCTGCAAGTATCCTCAAAAAATAGACGGAAAAATGCTGCAAGGTGTGTCCAGGTAAAAAGCAAAAGAAAGAACTTC | 997                                                    |                                            |      |      |      |      |      |      |      |  |
| Mouse | Chrd11 L | .....T.....G.....C.....AAG...CCTC...GCC...A.C----                                                     | 975                                                    |                                            |      |      |      |      |      |      |      |  |
| Mouse | Chrd11 S | .....T.....G.....C.....AAG...CCTC...GCC...A.C----                                                     | 975                                                    |                                            |      |      |      |      |      |      |      |  |
|       |          | 1010                                                                                                  | 1020                                                   | 1030                                       | 1040 | 1050 | 1060 | 1070 | 1080 | 1090 | 1100 |  |
| Human | CHRD1L   | CAGGCCAAAGCTTTGACAAATAAAGGCTACTTCTCGGGGAAGAAACGATGCCCTGTGTATGAGTCTGTATTCTATGAGGATGGGGAGACAAACAGAAAAAT | 1097                                                   |                                            |      |      |      |      |      |      |      |  |
| Mouse | Chrd11 L | .....GC.....T.C...T..T..A.....C.....A.....G.....A.....G.....                                          | 1064                                                   |                                            |      |      |      |      |      |      |      |  |
| Mouse | Chrd11 S | .....G.CTGGAGGCCCTGC...TG.TT.A-----                                                                   | 1002                                                   |                                            |      |      |      |      |      |      |      |  |
|       |          | 1110                                                                                                  | 1120                                                   | 1130                                       | 1140 | 1150 | 1160 | 1170 | 1180 | 1190 | 1200 |  |
| Human | CHRD1L   | AGCACTGGAGACTGAGAGACCACCTCAGGTAGAGGTCCACGTTTGGACTATTTCGAAAGGGCATTCTCCAGCACTTCCATATTGAGAAGATCTCCAAGAGG | 1197                                                   |                                            |      |      |      |      |      |      |      |  |
| Mouse | Chrd11 L | .....C.....A.....A.....A.....A.....A.....C.....C.....T.....                                           | 1164                                                   |                                            |      |      |      |      |      |      |      |  |
| Mouse | Chrd11 S | .....C.....A.....A.....A.....A.....A.....C.....C.....T.....                                           | 1002                                                   |                                            |      |      |      |      |      |      |      |  |
|       |          | 1210                                                                                                  | 1220                                                   | 1230                                       | 1240 | 1250 | 1260 | 1270 | 1280 | 1290 | 1300 |  |
| Human | CHRD1L   | ATGTTTGAGGAGCTTCTCTCAAGCTGGTGACCAACAACCTGAGCCAGTGGAAAGATCTTACCGAAGGAGAAGCTCAGATCAGCCAGATGTGTT         | 1297                                                   |                                            |      |      |      |      |      |      |      |  |
| Mouse | Chrd11 L | .....G.....C.A...T.....A..T..TC.G..C...T...A.....C.....T.....C.....                                   | 1264                                                   |                                            |      |      |      |      |      |      |      |  |
| Mouse | Chrd11 S | .....G.....C.A...T.....A..T..TC.G..C...T...A.....C.....T.....C.....                                   | 1002                                                   |                                            |      |      |      |      |      |      |      |  |
|       |          | 1310                                                                                                  | 1320                                                   | 1330                                       | 1340 | 1350 | 1360 | 1370 | 1380 |      |      |  |
| Human | CHRD1L   | CAAGTCGTGTATGCAGAACAGAGCTTGAAGATTAGTCAAGGTTTGTACTGGAGAGATCTGAAAAGGGCCACTGTTAG                         | 1377                                                   |                                            |      |      |      |      |      |      |      |  |
| Mouse | Chrd11 L | .....AG..G.....G.....C.....C.....G.....C.....A.....                                                   | 1344                                                   |                                            |      |      |      |      |      |      |      |  |
| Mouse | Chrd11 S | .....AG..G.....G.....C.....C.....G.....C.....A.....                                                   | 1002                                                   |                                            |      |      |      |      |      |      |      |  |

**Figure S2.** Multiple alignment of chordin-like 1 nucleotide sequences. Human *CHRD1* and mouse *Chrd11* protein-coding nucleotide sequences.

A

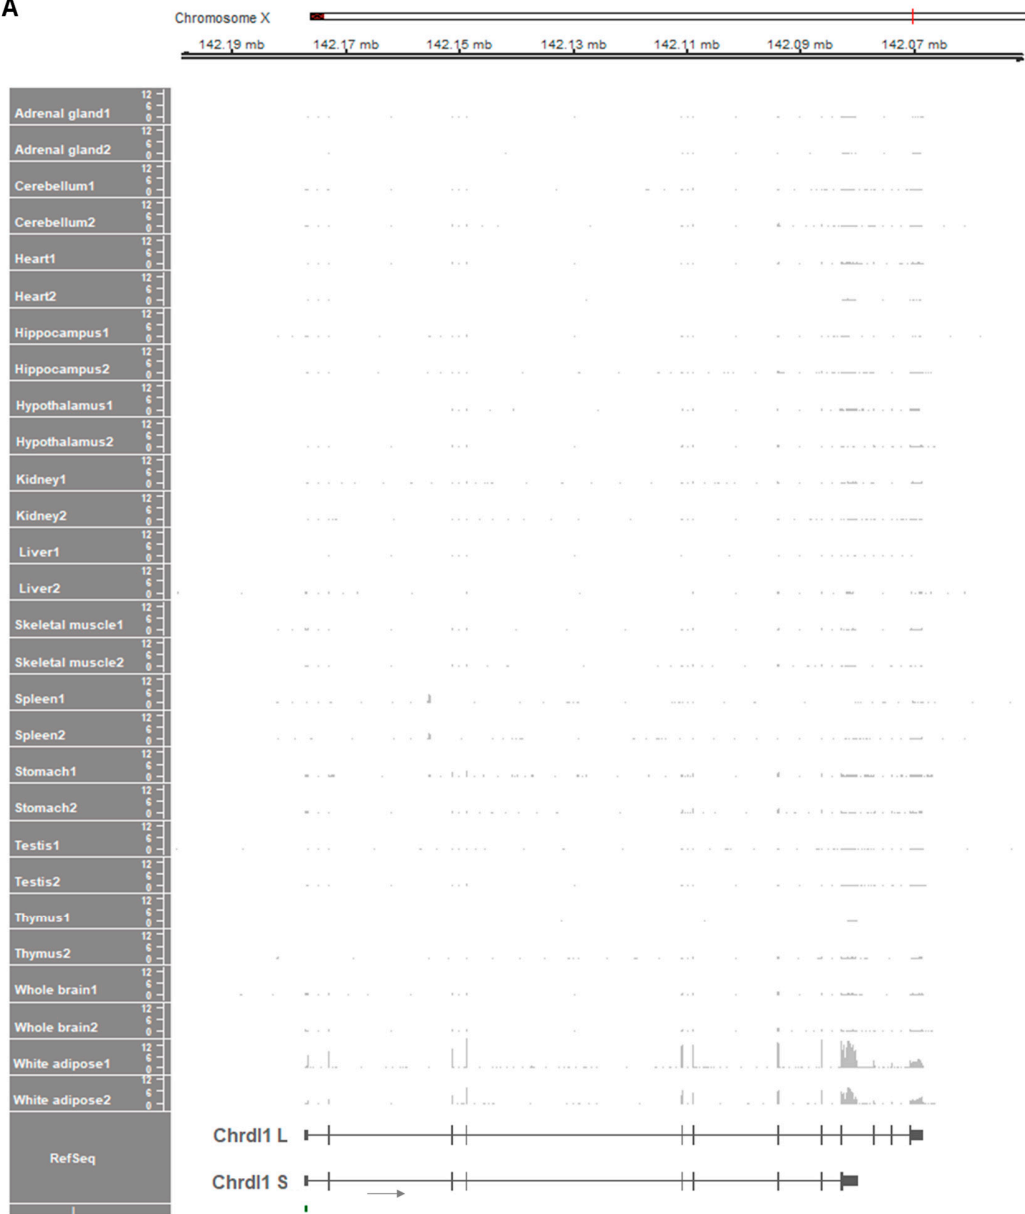

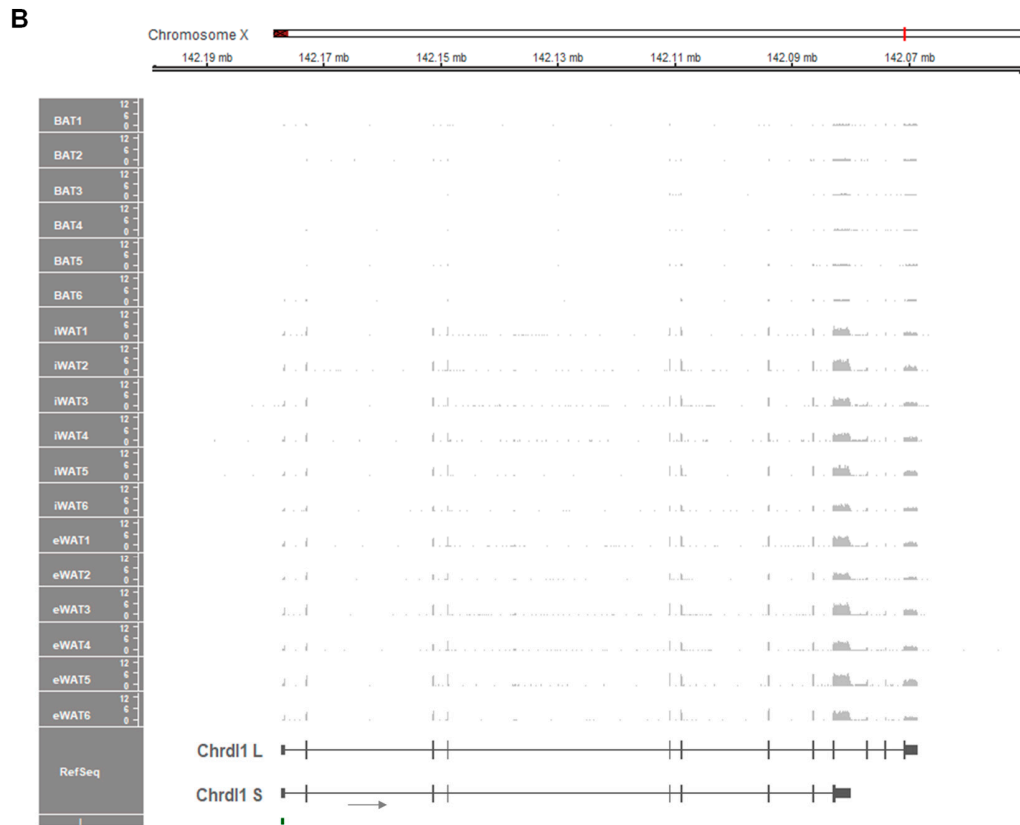

**Figure S3.** Expression levels of mouse *Chrdl1* mRNA. (A) Mouse *Chrdl1* mRNA expression in various tissues based on RNA-seq data (NCBI SRA study SRP020526). (B) RNA-seq read coverages of mouse *Chrdl1* in BAT, iWAT, and eWAT (GSE131861). TPM values are presented on the y-axis. These read coverages are averaged in Figure 1B. RefSeq, NCBI RefSeq gene; I, GpG island.

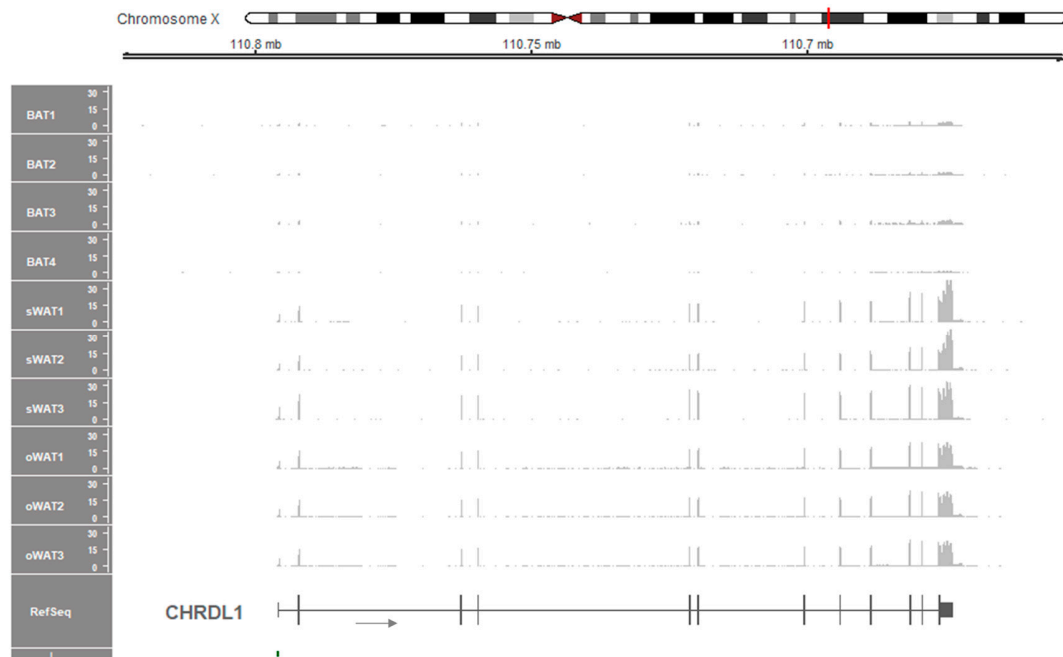

**Figure S4.** Expression levels of human *CHRD1* mRNA. RNA-seq read coverages of human *CHRD1* in BAT, oWAT, and sWAT. The y-axis represents TPM values. These read coverages are averaged in Figure 2B. RefSeq, NCBI RefSeq gene; I, GpG island.

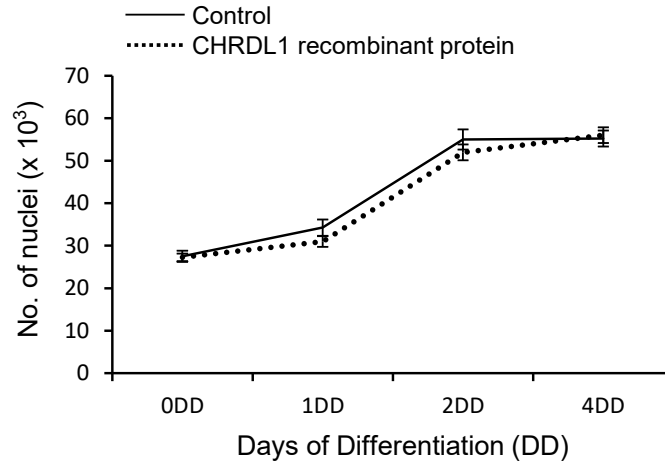

**Figure S5.** Measurement of cell numbers. Changes in numbers of nuclei in control and CHRDL1 recombinant protein-treated 3T3-L1 cells at 0, 1, 2 and 4 days of differentiation (DD). The Image-based Tool for Counting Nuclei (ITCN) was used for counting after DAPI staining. Values are represented as means  $\pm$  SEM ( $n = 4$ ). There was no significant difference between the groups at each time point.
